# Supplementary material
Source: PubMed Central journal article supplement (PMC3965314)

Set-1

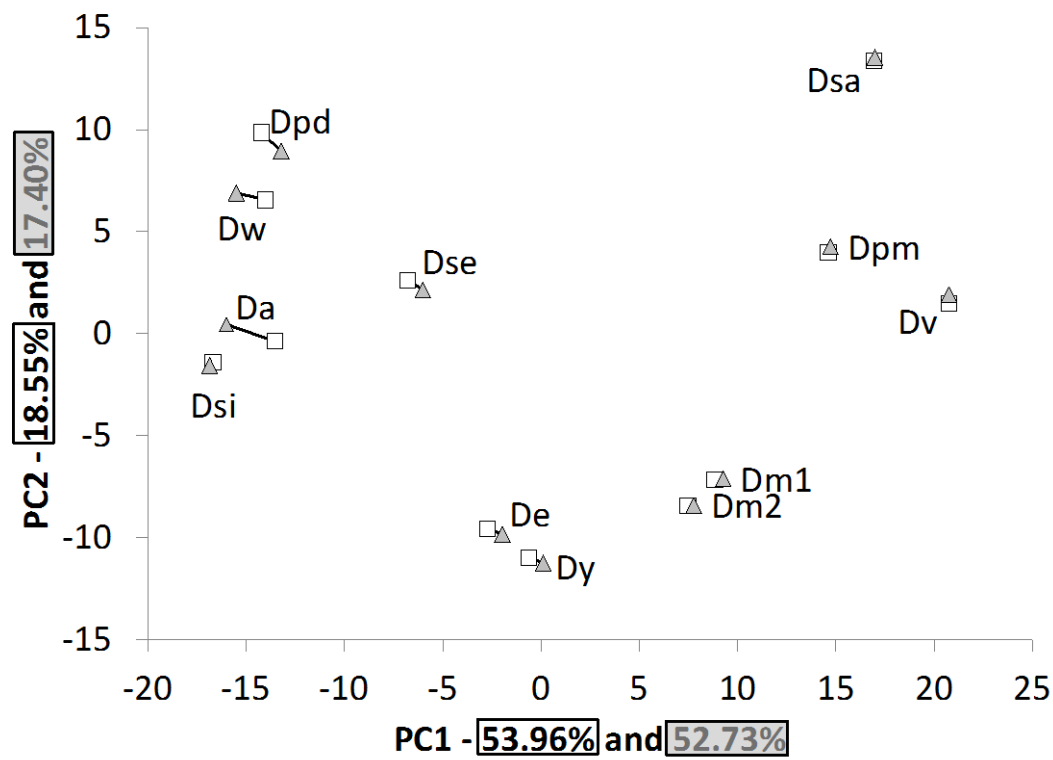

Set-2

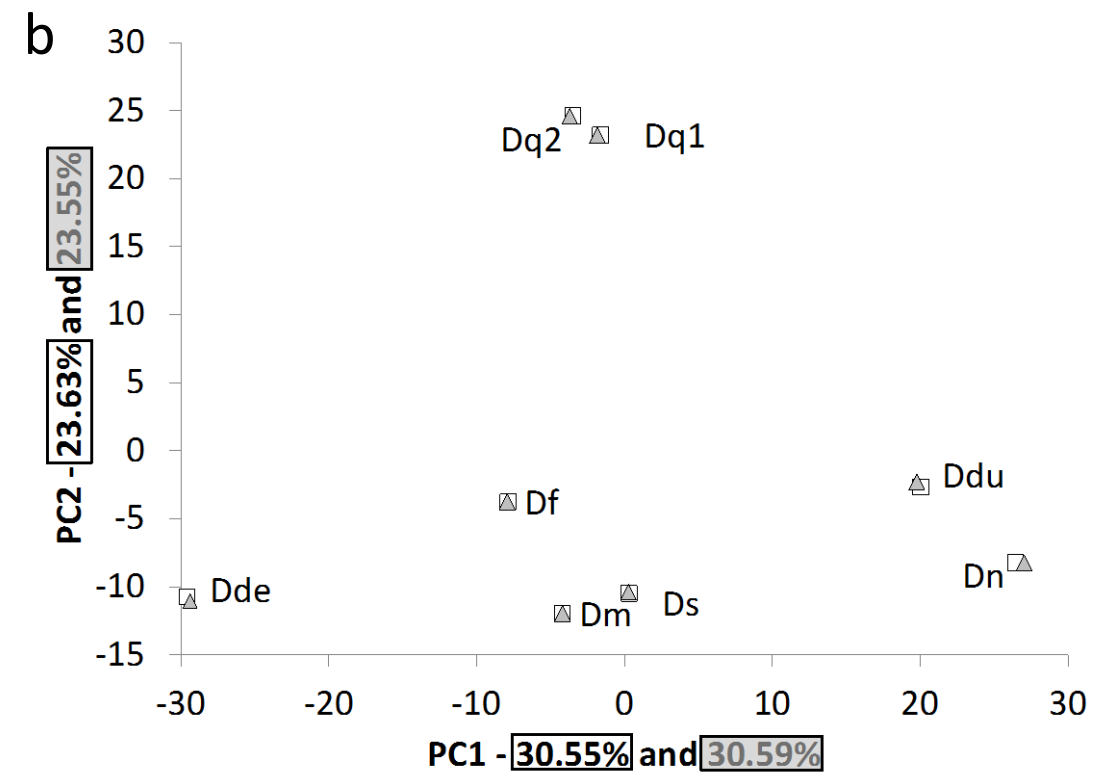

Set-3

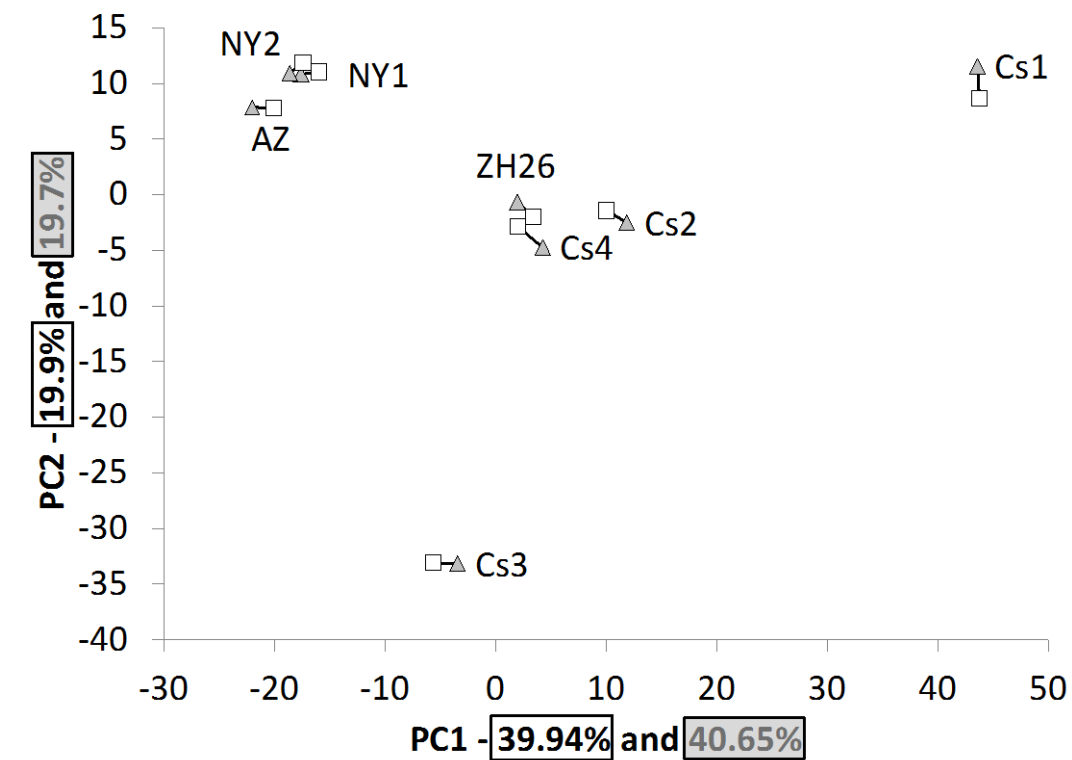

▲ Wolbachia reads included    □ Wolbachia reads excluded

Supplement: ismej201386x1.pdf [file ismej201386x1.pdf]

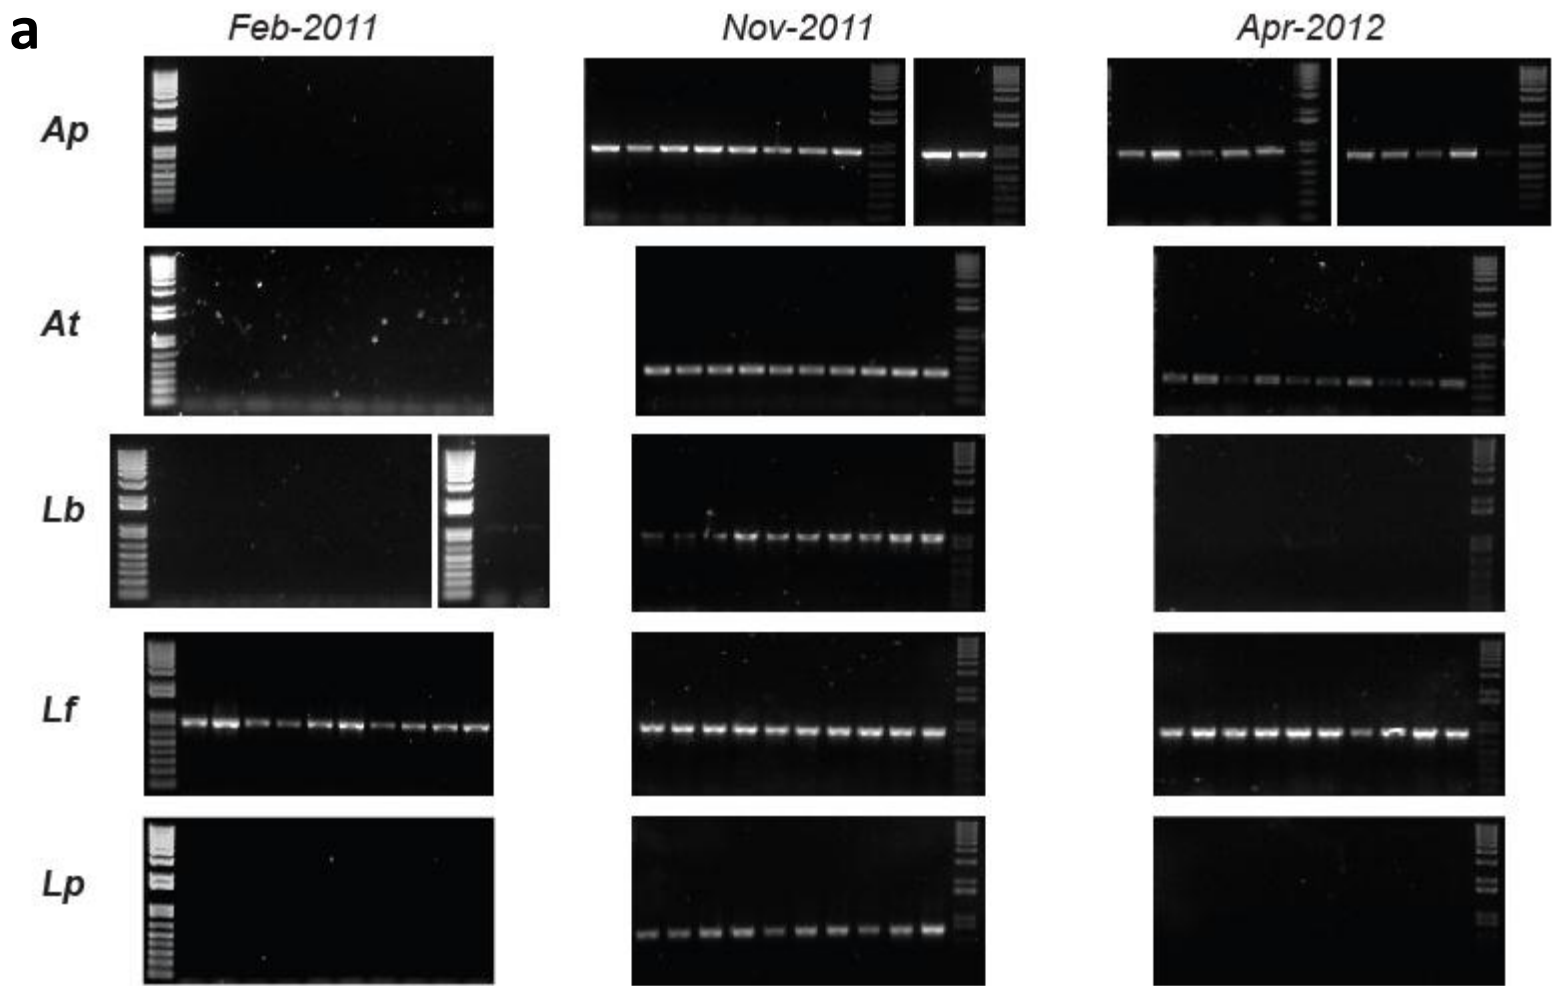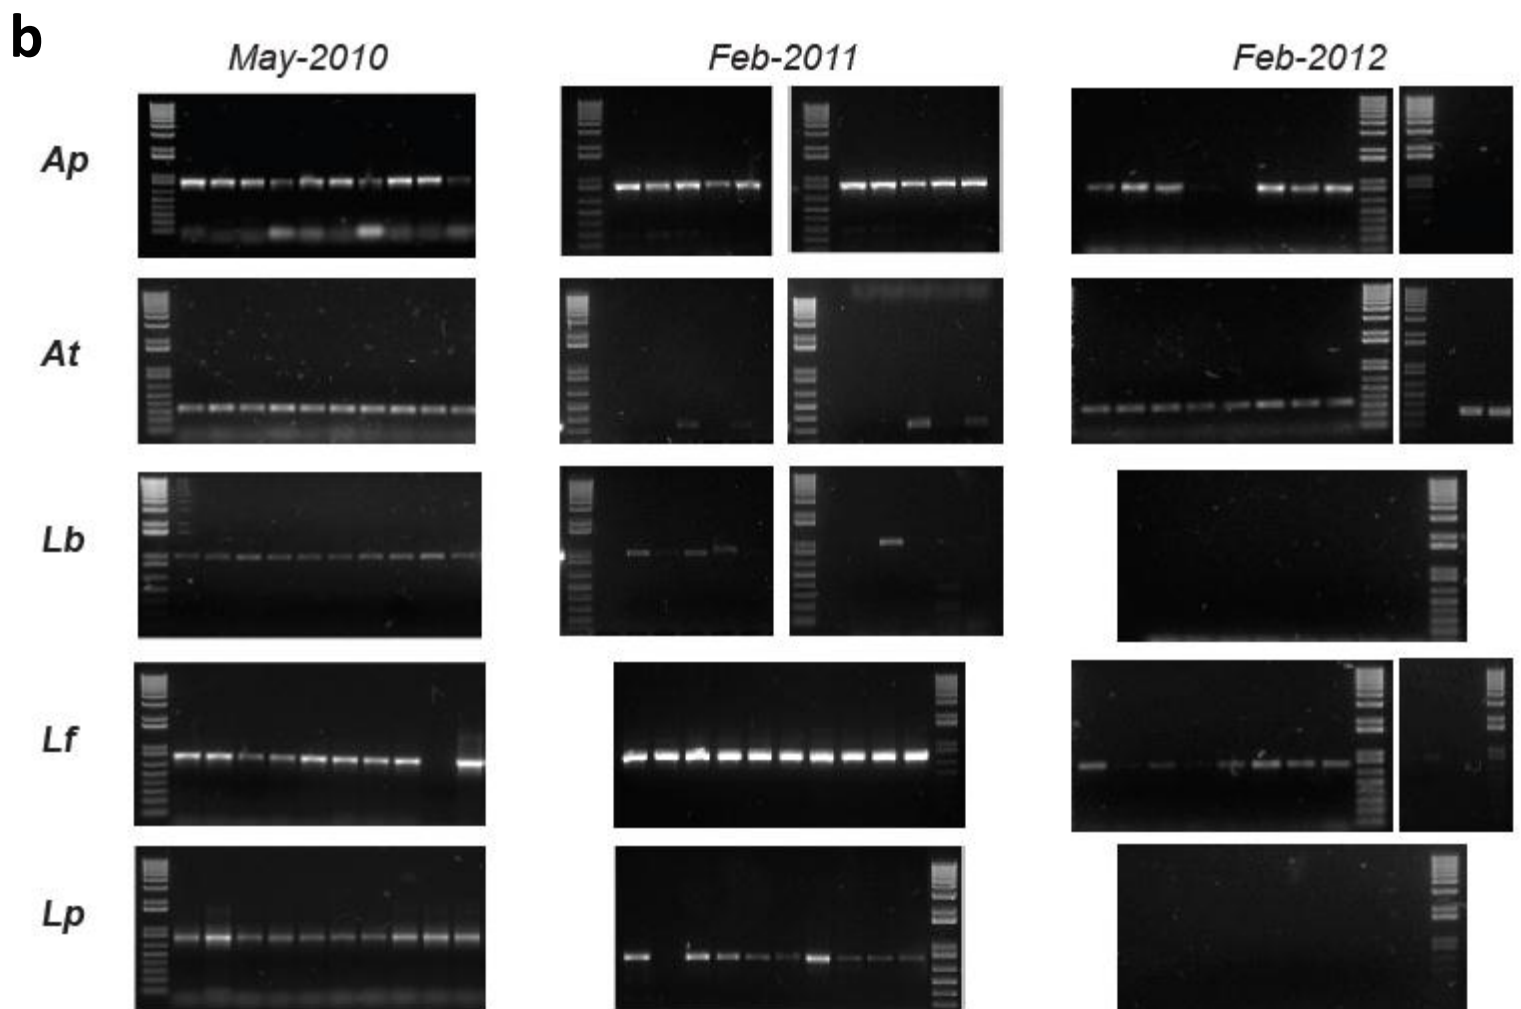

Supplement: ismej201386x2.pdf [file ismej201386x2.pdf]

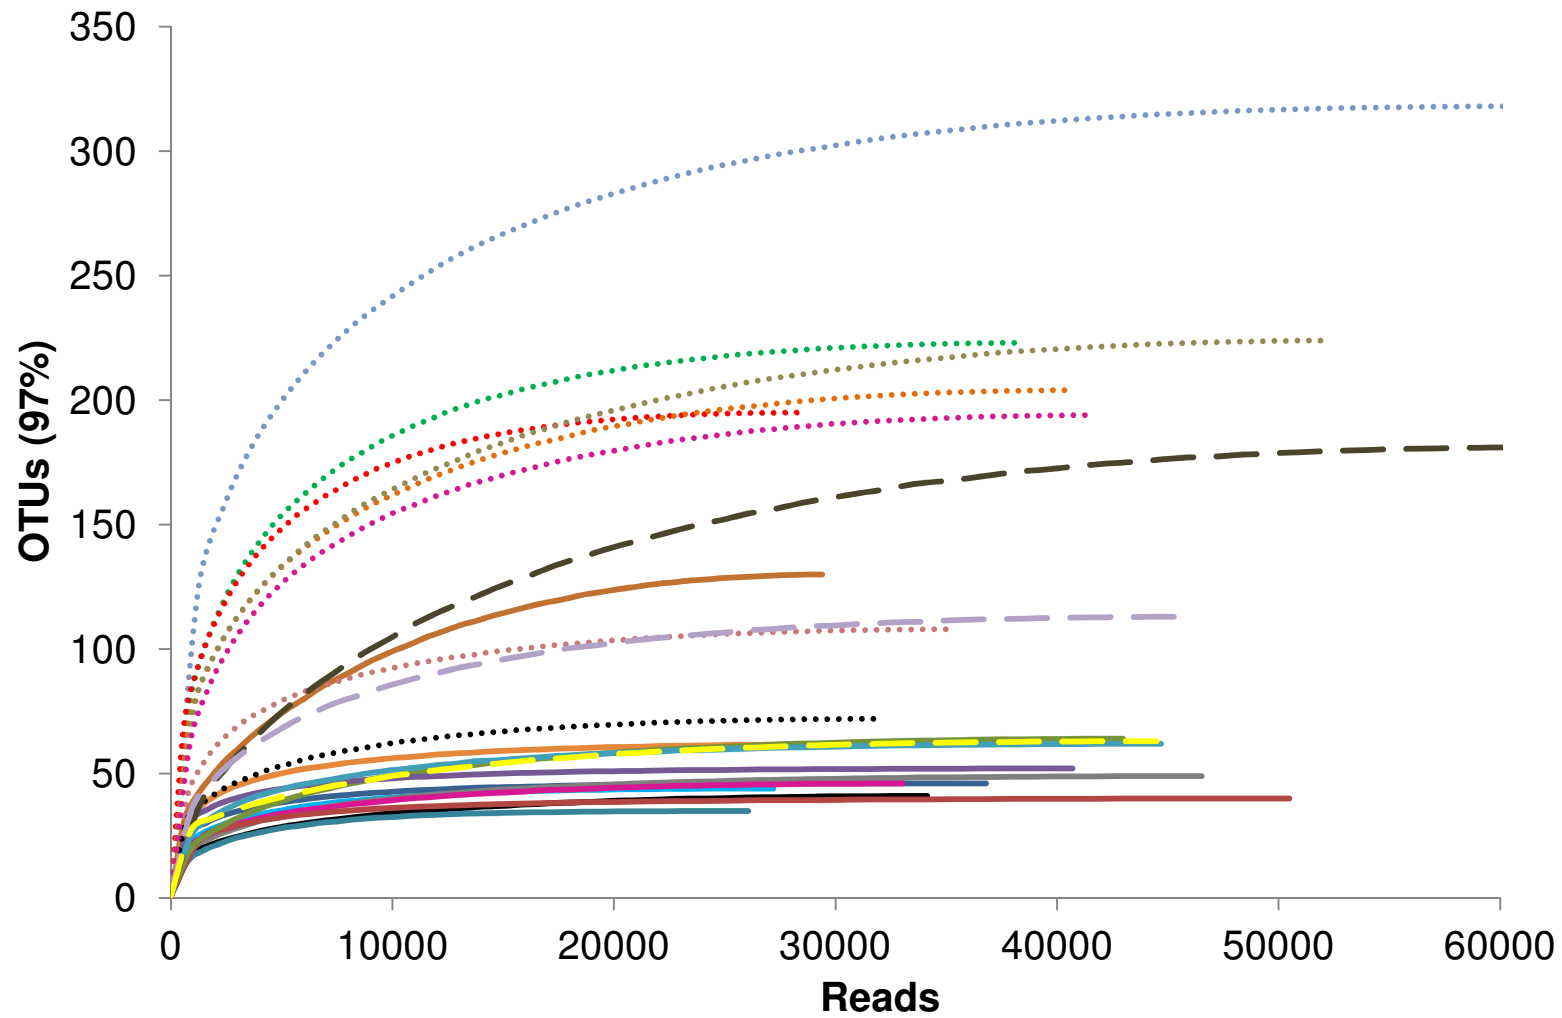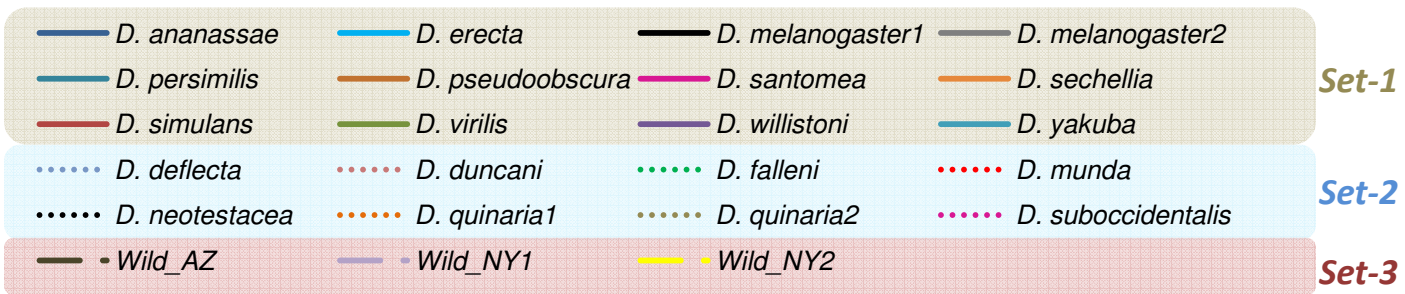

Supplement: ismej201386x3.pdf [file ismej201386x3.pdf]
